# Supplementary material for: In Site Soil Seed-Banks: Size, Composition and Persistence across Tropical Successional Stages
Source: MDPI journal article supplement (doi:10.3390/plants12152760), 2023-07-25
Supplement: s1 [file s1]

S1. List of plant species ( $\leq 50$  cm tall) within different taxonomic families, emerged from the soil seed-bank in primary forests (PF), secondary forests (SF) and old-fields (OF) in Southeast Mexico. Different plant growth-forms are indicated by different letters as follows: EH, epiphytes and hemi-epiphytes; H, herbs; L, woody lianas; P, palms; S, shrubs; and T, trees. Plants emerged directly from the mineral soil in the course of 12 months.

| Plant species and/or morphospecies | Family          | Successional stage | Growth-form |
|------------------------------------|-----------------|--------------------|-------------|
| <i>Abuta panamensis</i>            | Menispermaceae  | PF                 | L           |
| <i>Acacia hayesii</i>              | Fabaceae        | PF                 | L           |
| <i>Acacia usumacintesis</i>        | Fabaceae        | PF                 | T           |
| <i>Acalypha diversifolia</i>       | Euphorbiaceae   | PF, SF             | S           |
| <i>Acanthaceae</i> sp. 1           | Acanthaceae     | SF                 | H           |
| <i>Anthurium flexile</i>           | Araceae         | PF, SF             | EH          |
| <i>Anthurium</i> sp. 1             | Araceae         | PF, SF             | EH          |
| <i>Aphelandra deppeana</i>         | Acanthaceae     | PF                 | H           |
| <i>Araceae</i> sp. 1               | Araceae         | PF                 | H           |
| <i>Bidens pilosa</i>               | Asteraceae      | OF                 | H           |
| <i>Bignoniaceae</i> sp. 1          | Bignoniaceae    | PF                 | T           |
| <i>Brachiaria decumbens</i>        | Poaceae         | OF                 | H           |
| <i>Brosimum alicastrum</i>         | Moraceae        | PF                 | T           |
| <i>Calathea inocephala</i>         | Marantaceae     | PF                 | H           |
| <i>Calathea macrochlamys</i>       | Marantaceae     | PF                 | H           |
| <i>Calliandra</i> sp. 1            | Fabaceae        | OF                 | S           |
| <i>Cecropia peltata</i>            | Moraceae        | PF                 | T           |
| <i>Celtis iguanaea</i>             | Cannabaceae     | SF                 | L           |
| <i>Chamaedorea alternans</i>       | Arecaceae       | PF                 | P           |
| <i>Chamissoa altissima</i>         | Amaranthaceae   | PF                 | EH          |
| <i>Cissus gossypifolia</i>         | Vitaceae        | PF                 | EH          |
| <i>Cissus</i> sp. 1                | Vitaceae        | SF                 | L           |
| <i>Commelina</i> sp. 1             | Commelinaceae   | PF                 | S           |
| <i>Asteraceae</i> sp. 1            | Asteraceae      | OF                 | H           |
| <i>Conostegia</i> sp. 1            | Melastomataceae | OF                 | S           |
| <i>Cupania glabra</i>              | Sapindaceae     | OF                 | T           |
| <i>Curcubitaceae</i> sp. 1         | Curcubitaceae   | SF                 | EH          |
| <i>Cymbopetalum penduliflorum</i>  | Annonaceae      | PF                 | T           |
| <i>Cyperus</i> sp. 1               | Cyperaceae      | OF                 | H           |
| <i>Dalbergia</i> sp. 1             | Fabaceae        | OF                 | T           |
| <i>Desmodium rastrera</i>          | Fabaceae        | OF                 | EH          |
| <i>Desmodium</i> sp. 1             | Fabaceae        | OF                 | EH          |
| <i>Doliocarpus dentatus</i>        | Dilleniaceae    | OF                 | L           |

|                                |                |        |    |
|--------------------------------|----------------|--------|----|
| Euphorbiaceae sp. 1            | Euphorbiaceae  | SF, OF | L  |
| Fabaceae sp. 1                 | Fabaceae       | SF     | T  |
| <i>Hamelia patens</i>          | Rubiaceae      | OF     | S  |
| <i>Heliconia</i> sp. 1         | Heliconiaceae  | SF     | H  |
| <i>Ipomoea discolor</i>        | Convolvulaceae | OF     | L  |
| <i>Iresine arbuscula</i>       | Amaranthaceae  | PF     | T  |
| Loganiaceae sp. 1              | Loganiaceae    | OF     | H  |
| <i>Luehea</i> sp. 1            | Malvaceae      | SF     | T  |
| <i>Lycianthes nitida</i>       | Solanaceae     | PF     | S  |
| <i>Macfadyena uncata</i>       | Bignoniaceae   | PF     | L  |
| <i>Matayba</i> sp. 1           | Sapindaceae    | OF     | T  |
| <i>Mendoncia retusa</i>        | Acanthaceae    | SF     | L  |
| <i>Mikania aromatica</i>       | Asteraceae     | PF     | EH |
| <i>Mikania</i> sp. 1           | Asteraceae     | OF     | H  |
| <i>Mikania</i> sp. 2           | Asteraceae     | OF     | L  |
| <i>Monstera</i> sp. 1          | Araceae        | PF     | EH |
| <i>Monstera tuberculata</i>    | Araceae        | SF     | EH |
| <i>Nectandra salicifolia</i>   | Lauraceae      | SF     | T  |
| <i>Neurolaena</i> sp. 1        | Asteraceae     | OF     | H  |
| <i>Paspalum</i> sp. 1          | Poaceae        | OF     | H  |
| Petridophyta sp. 1             | Petridophyta   | PF     | H  |
| <i>Physalys</i> sp. 1          | Solanaceae     | OF     | H  |
| <i>Piper aequale</i>           | Piperaceae     | SF     | S  |
| <i>Piper hispidum</i>          | Piperaceae     | SF, OF | S  |
| <i>Piper</i> sp. 1             | Piperaceae     | SF     | S  |
| <i>Polypodium</i> sp. 1        | Polypodiaceae  | SF     | H  |
| <i>Psychotria papantlemsis</i> | Rubiaceae      | PF     | S  |
| <i>Psychotria chiapensis</i>   | Rubiaceae      | SF     | T  |
| <i>Quararibea funebris</i>     | Malvaceae      | PF     | T  |
| <i>Rhodospatha wendlandii</i>  | Araceae        | PF     | L  |
| <i>Rinorea humilis</i>         | Violaceae      | SF     | T  |
| <i>Rinorea</i> sp. 1           | Violaceae      | PF     | T  |
| <i>Rourea</i> sp. 1            | Connaraceae    | PF     | L  |
| <i>Rourea glabra</i>           | Connaraceae    | PF     | L  |
| Rubiaceae sp. 1                | Rubiaceae      | OF     | H  |
| <i>Schizolobium parahybum</i>  | Fabaceae       | PF     | T  |
| <i>Scleria pterota</i>         | Cyperaceae     | OF     | H  |
| <i>Serjania</i> sp. 1          | Sapindaceae    | PF     | L  |
| <i>Sida rhombifolia</i>        | Malvaceae      | OF     | H  |
| <i>Solanum</i> sp. 1           | Solanaceae     | SF     | L  |
| <i>Spondias radlkoferi</i>     | Anacardiaceae  | PF     | T  |
| <i>Syngonium podophyllum</i>   | Araceae        | PF, SF | EH |
| <i>Trichilia erythrocarpa</i>  | Meliaceae      | SF     | T  |

|                           |              |        |    |
|---------------------------|--------------|--------|----|
| <i>Trophis racemosa</i>   | Moraceae     | SF     | T  |
| Verbenaceae sp. 1         | Verbenaceae  | OF     | H  |
| <i>Vernonia patens</i>    | Asteraceae   | OF     | S  |
| <i>Vismia camparaguey</i> | Hypericaceae | OF     | T  |
| EH sp. 1                  | Undetermined | OF     | EH |
| Herb sp. 1                | Undetermined | SF     | H  |
| Herb sp. 2                | Undetermined | SF, OF | H  |
| Herb sp. 3                | Undetermined | SF, OF | H  |
| Herb sp. 4                | Undetermined | SF, OF | H  |
| Herb sp. 5                | Undetermined | OF     | H  |
| Herb sp. 6                | Undetermined | OF     | H  |
| Liana sp. 1               | Undetermined | SF     | L  |
| Liana sp. 2               | Undetermined | SF     | L  |
| Liana sp. 3               | Undetermined | SF, OF | L  |
| Liana sp. 4               | Undetermined | OF     | L  |
| Liana sp. 5               | Undetermined | OF     | L  |
| Shrub sp.1                | Undetermined | SF     | S  |
| Tree sp. 1                | Undetermined | SF     | T  |
| Tree sp. 2                | Undetermined | PF     | T  |

---
